# Supplementary material for: Charge-transfer state and state mixing in tetracyanoquinodimethane probed using electroabsorption spectroscopy
Source: Royal Society of Chemistry journal article supplement (doi:10.1039/d3cp01669b), 2023-01-01
Supplement: d3cp01669b1.pdf [file d3cp01669b1.pdf]

**Supplementary Electronic Information for**

**Charge-transfer state and state mixing in tetracyanoquinodimethane  
probed using electroabsorption spectroscopy**

Ahatashamul Islam, Kensuke Syundo and Toshifumi Iimori\*

*Department of Sciences and Informatics, Muroran Institute of Technology,*

*Mizumoto-cho 27-1, Muroran, Hokkaido 050-8585, Japan.*

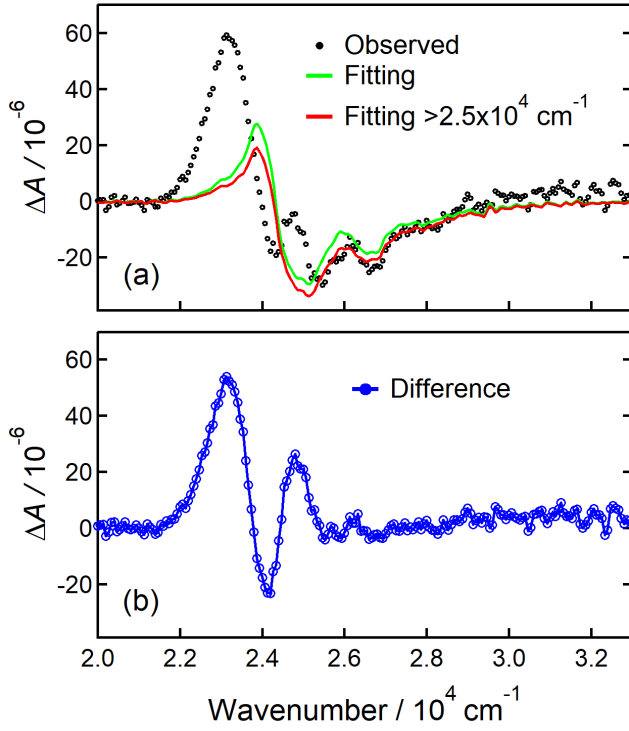

Fig. S1. (a) The electroabsorption (EA) spectrum (black circle), the fitting result using a single set of coefficients and the entire absorption spectrum without band separation at the entire wavenumbers (green line), and the fitting result at higher wavenumbers than  $2.5 \times 10^4 \text{ cm}^{-1}$  (red line). (b) Difference between the observed EA spectrum and the fitting spectrum at wavenumbers higher than  $2.5 \times 10^4 \text{ cm}^{-1}$ .

### Gaussian band fitting of absorption and electroabsorption (EA) spectra

In our analysis, the sum of eight Gaussian band shapes was used to reproduce the absorption spectrum.

$$A(\bar{\nu}) = \sum_{i=1}^8 a_i \exp \left\{ -\frac{(\bar{\nu} - c_i)^2}{b_i^2} \right\}, \quad (\text{S1})$$

where  $\bar{\nu}$  is the wavenumber of light, and  $a_i$ ,  $b_i$ ,  $c_i$  are parameters representing the maximum amplitude, line width ( $\text{cm}^{-1}$ ), and wavenumber ( $\text{cm}^{-1}$ ) at the maximum, respectively. The parameter values are shown in Table S1.

**Table S1. Parameters of the Eight Gaussian Bands**

| Gaussian band | parameters | values  |
|---------------|------------|---------|
| G-1           | $a_1$      | 0.0816  |
|               | $b_1$      | 892.69  |
|               | $c_1$      | 24014   |
| G-2           | $a_2$      | 0.2182  |
|               | $b_2$      | 592.93  |
|               | $c_2$      | 24564   |
| G-3           | $a_3$      | 0.0480  |
|               | $b_3$      | 424.91  |
|               | $c_3$      | 25092   |
| G-4           | $a_4$      | 0.1849  |
|               | $b_4$      | 701.84  |
|               | $c_4$      | 25411   |
| G-5           | $a_5$      | 0.1033  |
|               | $b_5$      | 702.65  |
|               | $c_5$      | 26381   |
| G-6           | $a_6$      | 0.0625  |
|               | $b_6$      | 1191.98 |
|               | $c_6$      | 27113   |
| G-7           | $a_7$      | 0.0657  |
|               | $b_7$      | 2483    |
|               | $c_7$      | 27279   |
| G-8           | $a_8$      | 0.0296  |
|               | $b_8$      | 9250.54 |
|               | $c_8$      | 40012   |
